# Supplementary material for: In situ imaging and control of layer-by-layer femtosecond laser thinning of graphene
Source: Royal Society of Chemistry journal article supplement (doi:10.1039/c4nr07078j), 2015-01-01
Supplement: c4nr07078j1.pdf [file c4nr07078j1.pdf]

# ***In-situ* imaging and control of layer-by-layer femtosecond laser thinning of graphene**

D.W. Li,<sup>a</sup> Y.S. Zhou,<sup>a</sup> X. Huang,<sup>a</sup> L. Jiang,<sup>b</sup> J.-F. Silvain,<sup>c</sup> and Y.F. Lu<sup>\* a</sup>

<sup>a</sup>Department of Electrical and Computer Engineering, University of Nebraska-Lincoln, Lincoln, NE  
68588-0511, USA

\* Corresponding author, E-mail: [ylu2@unl.edu](mailto:ylu2@unl.edu)

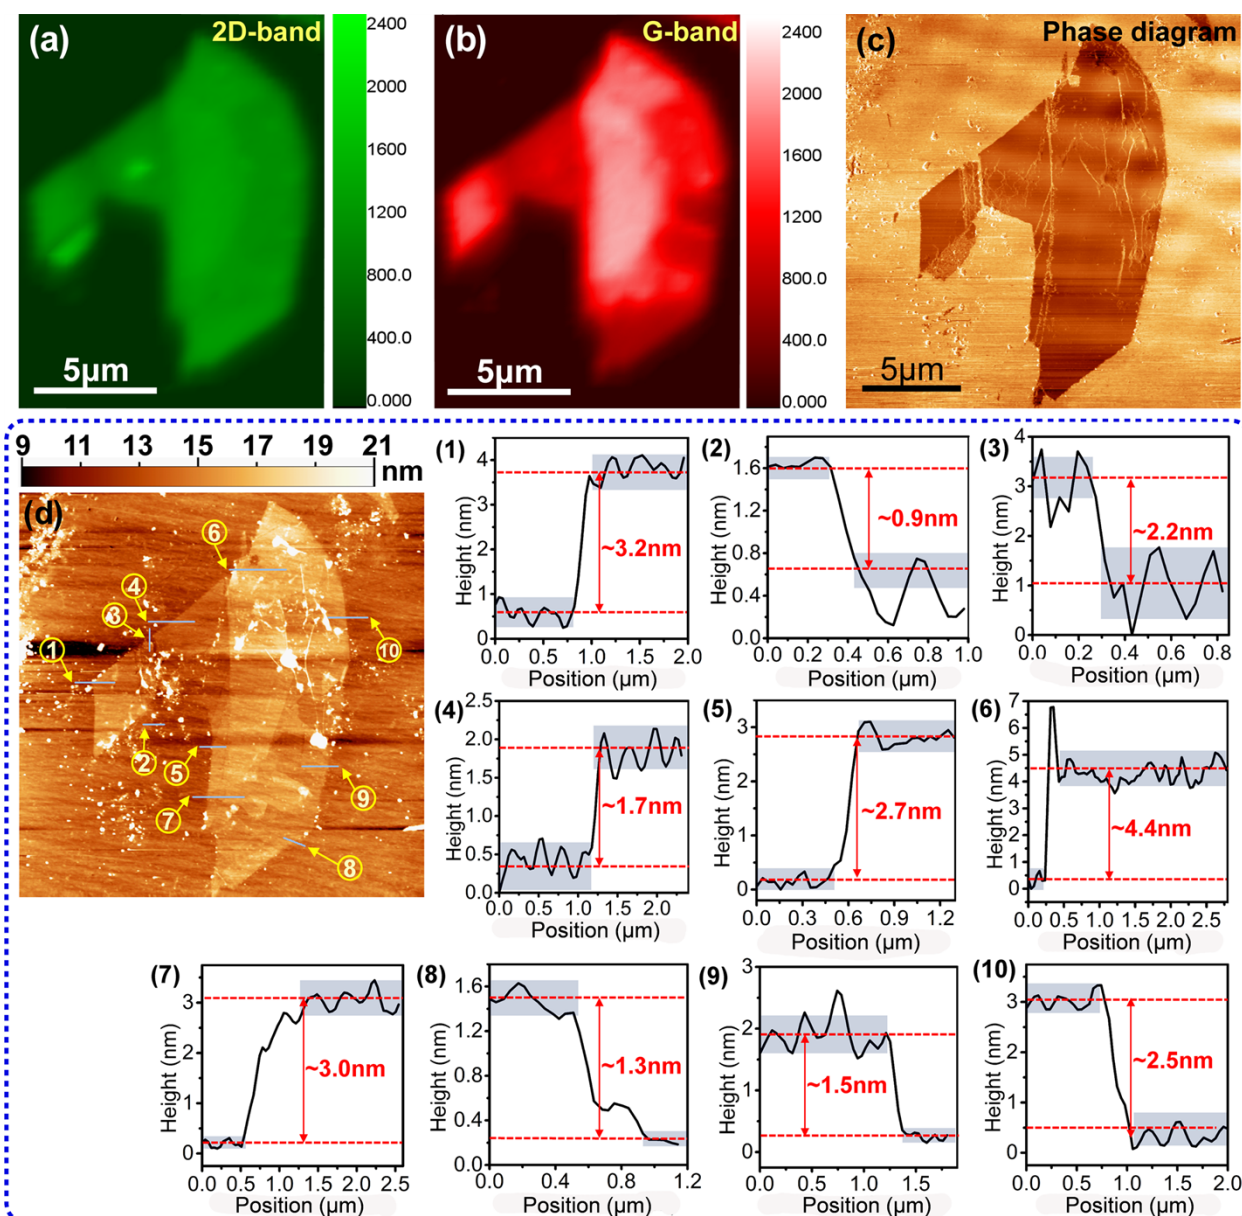

**Figure S1.** Raman mapping of (a) 2D-band, (b) G-band, and (c) phase diagram of few-layer graphene in Fig. 3a; (d) AFM image of the few-layer graphene and (1-10) corresponding thickness profiles along the lines in (d).

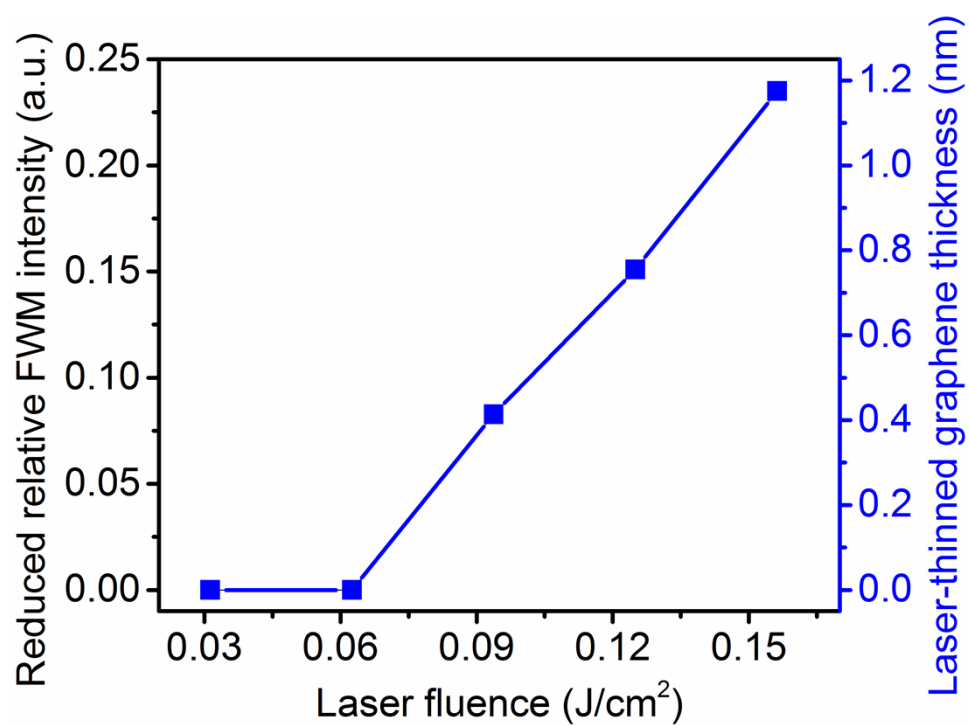

**Figure S2.** Fluence threshold for the fs laser thinning of few-layer exfoliated graphene with a thickness of 5 nm. (pulse duration: 100 fs, wavelength: 800 nm)

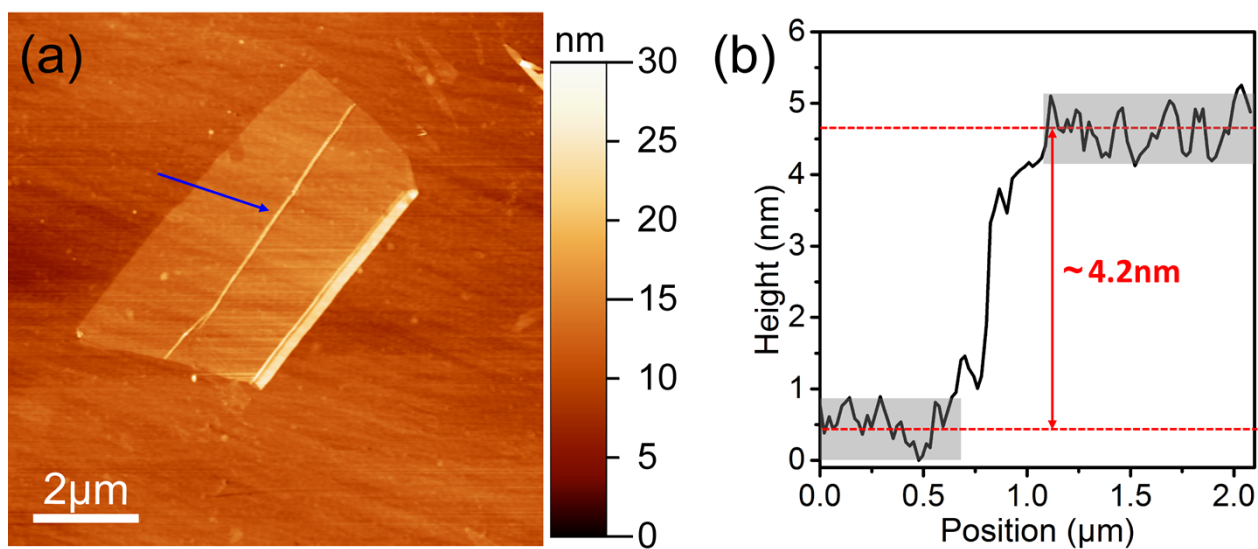

**Figure S3.** (a) AFM image of the few-layer graphene; (b) the corresponding thickness profile along the line in (a).
